# Supplementary material
Source: publisher figshare collection journal article supplement (https://tandf.figshare.com/ndownloader/files/12558644)
Supplement: Supplementary file 1 [file 12558644]

**Supplementary Table 7.** Structure of endophyte communities in Cupressaceae as a function of biotic zone, host genus, and elevation.

1. PERMANOVA

+P value is adjusted by the BH method in R, which controls the false discovery rate.

| Factors | R2  (Jaccard) | P value+ | R2  (Morisita-Horn) | P value+ |
| --- | --- | --- | --- | --- |
| Biotic zone | 0.2497 | 0.001* | 0.3981 | 0.001* |
| Genus | 0.2157 | 0.002* | 0.3475 | 0.001* |
| Elevation | 0.1608 | 0.001* | 0.2870 | 0.001* |
| Biotic zone x Genus | 0.2497 | 0.001* | 0.3981 | 0.001* |
| Biotic zone x Elevation | 0.3918 | 0.001* | 0.5639 | 0.001* |
| Genus x Elevation | 0.3029 | 0.002* | 0.4529 | 0.002* |
| **Biotic zone x Genus x Elevation** | **0.3918** | **0.001*** | **0.5639** | **0.001*** |

1. ANOSIM

+P value is adjusted by the BH method in R, which controls the false discovery rate.

| Factors | R  (Jaccard) | P value+ | R  (Morisita-Horn) | P value+ |
| --- | --- | --- | --- | --- |
| Biotic zone | 0.4252 | 0.004* | 0.4292 | 0.002* |
| Genus | 0.5964 | 0.033* | 0.6263 | 0.005* |
| Elevation | 0.3887 | 0.004* | 0.476 | 0.002* |
| Biotic zone x Genus | 0.4252 | 0.005* | 0.4292 | 0.002* |
| Biotic zone x Elevation | 0.4755 | 0.004* | 0.4915 | 0.002* |
| Genus x Elevation | 0.5818 | 0.004* | 0.6196 | 0.002* |
| **Biotic zone x Genus x Elevation** | **0.4755** | **0.005*** | **0.4915** | **0.002*** |
